# Supplementary material for: Constructing novel fiber electrodes with porous nickel yarns for all-solid-state flexible wire-shaped supercapacitors
Source: Royal Society of Chemistry journal article supplement (doi:10.1039/d0nj03308a), 2020-01-01
Supplement: d0nj03308a1.pdf [file d0nj03308a1.pdf]

## Electronic Supplementary Information

Constructing novel fiber electrodes with porous nickel yarns for all-solid-state flexible wire-shaped supercapacitors

Xuran Han<sup>‡</sup>, Jiahao Zhu<sup>‡</sup>, Linna Lei, Yue Wang, Tian Lan, Chaoqun Kang, Yi Li\* and Yanwen Ma\*

Key Laboratory for Organic Electronics and Information Displays & Jiangsu Key Laboratory for Biosensors, Institute of Advanced Materials (IAM), Jiangsu National Synergetic Innovation Center for Advanced Materials (SICAM), Nanjing University of Posts & Telecommunications, 9 Wenyuan Road, Nanjing 210023, China.

\*Corresponding Author

E-mail: [iamywma@njupt.edu.cn](mailto:iamywma@njupt.edu.cn); [iamyli@njupt.edu.cn](mailto:iamyli@njupt.edu.cn)

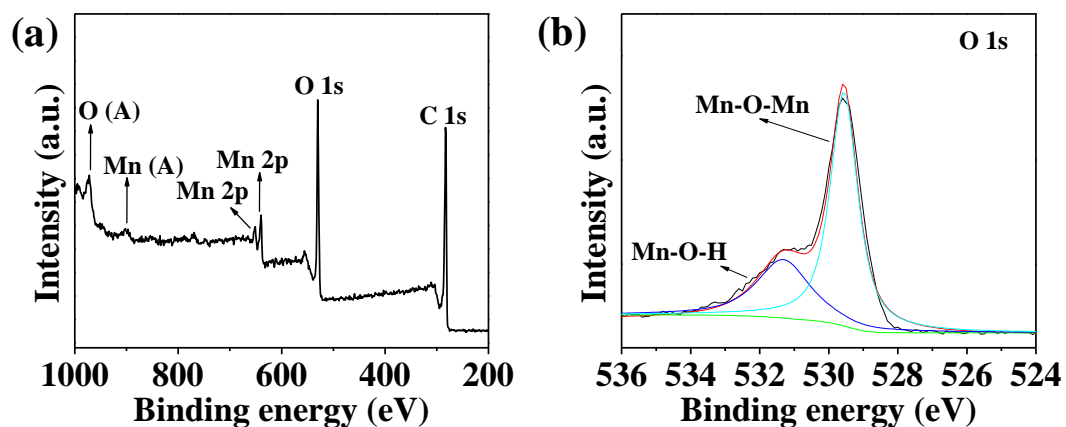

**Figure S1** The survey scan and O 1s XPS spectra of MnO<sub>2</sub>/rGO/PHNYs.

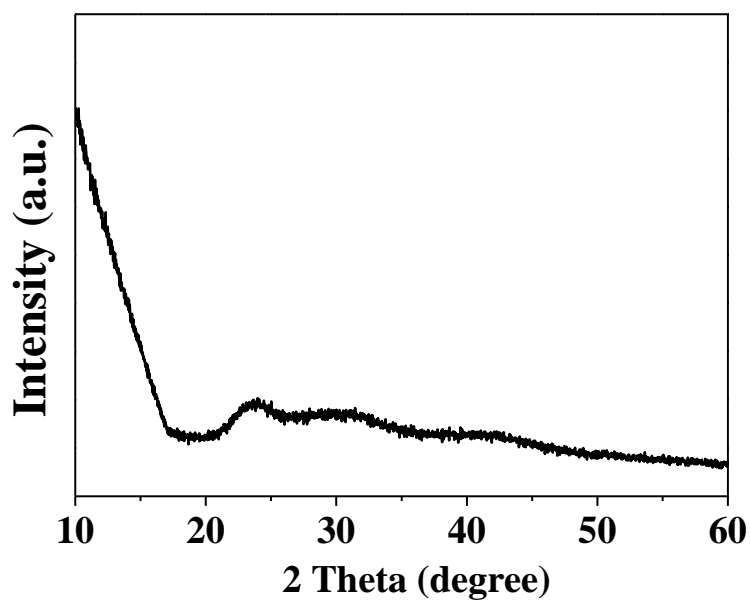

**Figure S2** XRD pattern of MnO<sub>2</sub>/rGO/PHNYs. Two broad peaks at 23.9 and 31.5 are observed, corresponding to the graphite (002) and (100) diffraction peak of rGO, respectively.

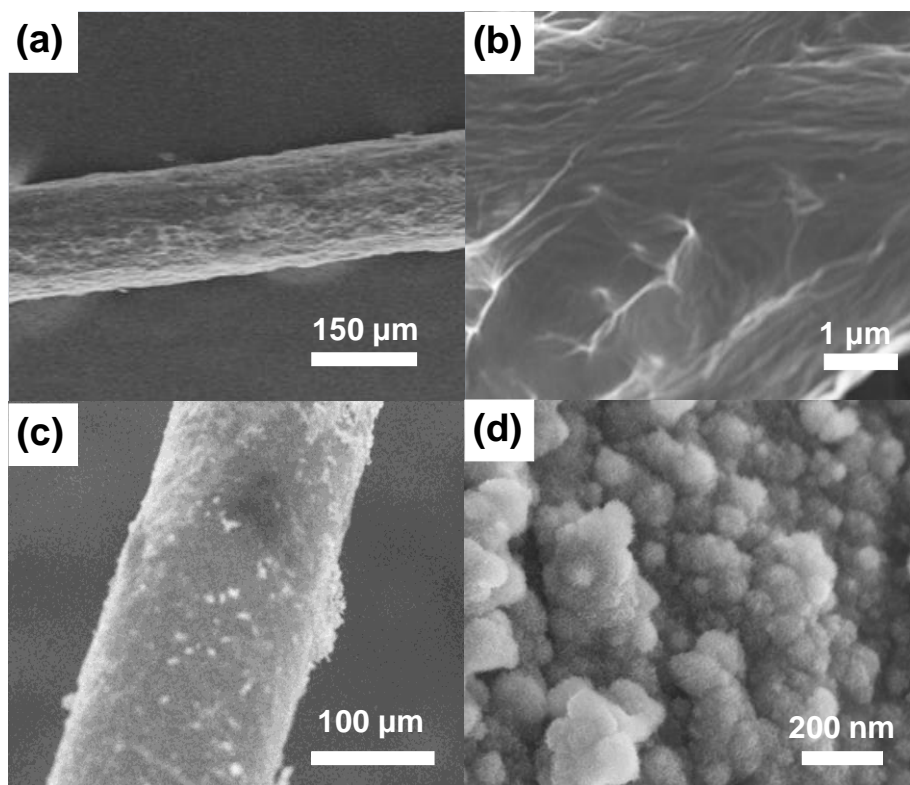

**Figure S3** (a, b) Low and high resolution SEM images of rGO/Ni wire. (c, d) SEM images of MnO<sub>2</sub>/rGO/Ni wire. The mass loading density of rGO and MnO<sub>2</sub> is 0.029 and 0.056 mg cm<sup>-1</sup>, respectively.

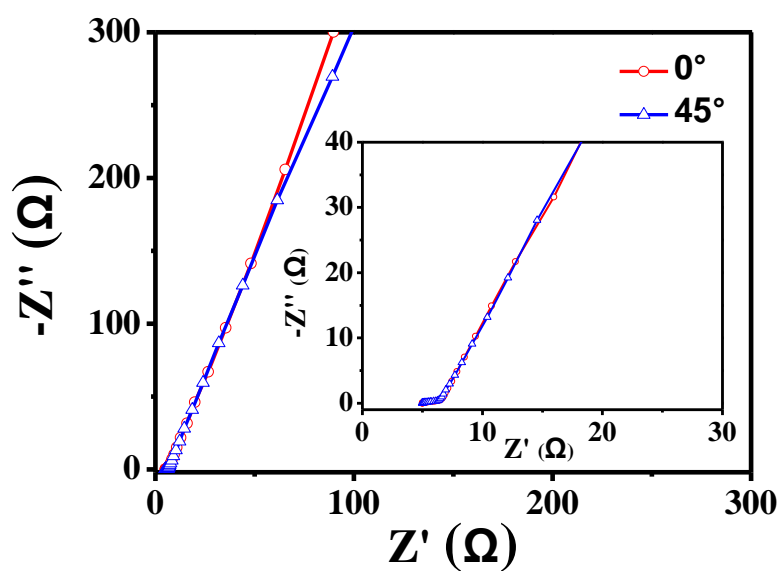

**Figure S4** Nyquist plots of WSSCs based on MnO<sub>2</sub>/rGO/PNYs electrodes under flat and bending 45° conditions.

**Table. S1** Performance of two-electrode fiber-shaped supercapacitors based on MnO<sub>2</sub> materials

| Active materials                              | C <sub>V</sub> <sup>a)</sup> | Condition                                    | Reference |
|-----------------------------------------------|------------------------------|----------------------------------------------|-----------|
| MnO <sub>2</sub> /MGr@Ni wire                 | 9.8                          | GCD <sup>b)</sup> at 0.1 mA cm <sup>-1</sup> | [1]       |
| MnO <sub>2</sub> /rGO@Ni wire                 | 7.2                          | GCD at 0.1 mA cm <sup>-2</sup>               | [2]       |
| MnO <sub>2</sub> /CNT@nylon fiber             | 3.8                          | CV <sup>c)</sup> at 10 mV s <sup>-1</sup>    | [3]       |
| MnO <sub>2</sub> @carbon fiber                | 2.5                          | GCD at 0.02 A cm <sup>-3</sup>               | [4]       |
| MnO <sub>2</sub> /rGO@carbon fiber            | 13.7                         | GCD at 0.5 mA cm <sup>-2</sup>               | [5]       |
| MnO <sub>2</sub> /CNT hybrid fiber            | 74.8                         | GCD at 0.1 A cm <sup>-3</sup>                | [6]       |
| MnO <sub>2</sub> /CNT@CNT coated rubber fiber | 0.92                         | CV at 10 mV s <sup>-1</sup>                  | [7]       |
| MnO <sub>2</sub> /rGO@Ni coated hair          | 4.1                          | CV at 100 mV s <sup>-1</sup>                 | [8]       |
| MnO <sub>2</sub> @CNT yarn                    | 34.6                         | CV at 10 mV s <sup>-1</sup>                  | [9]       |
| MnO <sub>2</sub> /rGO@PHNYs                   | 36.8                         | GCD at 0.1 A cm <sup>-3</sup>                | This work |

a) Volumetric capacitance; b) Galvanostatic charge–discharge test (GCD); c) Cyclic voltammograms (CV).

## References

- [1] M. Hu, Y. Liu, M. Zhang, H. Wei and Y. Gao, *J. Power Sources*, 2016, **335**, 113–120.
- [2] J. Zhou, N. Chen, Y. Ge, H. Zhu, X. Feng, R. Liu, Y. Ma, L. Wang and W. Hou, *Sci. China Mater.*, 2018, **61**, 243–253.
- [3] C. Choi, S. H. Kim, H. J. Sim, J. A. Lee, A. Y. Choi, Y. T. Kim, X. Lepro, G. M. Spinks and R. H. Baughman, S. J. Kim, *Sci. Rep.*, 2015, **5**, 9387.
- [4] X. Xiao, T. Q. Li, P. H. Yang, Y. Gao, H. Y. Jin, W. J. Ni, W. H. Zhan, X. H. Zhang, Y. Z. Cao, J. W. Zhong, L. Gong, W. C. Yen, W. J. Mai, J. Chen, K. F. Huo, Y. L. Chueh, Z. L. Wang and J. Zhou, *ACS Nano*, 2012, **6**, 9200–9206.
- [5] Z. Zhang, F. Xiao and S. Wang, *J. Mater. Chem. A*, 2015, **3**, 11215–11223.
- [6] G. Li, P. Hou, J. Luan, J. Li, X. Li, H. Wang, C. Shi, C. Liu and H. Cheng, *Carbon*, 2018, **140**, 634–643.
- [7] C. Choi, J. H. Kim, H. J. Sim, J. Di, R. H. Baughman and S. J. Kim, *Adv. Energy Mater.*, 2017, **7**, 1602021–1602027.
- [8] W. Liu, K. Feng, Y. Zhang, T. Yu, L. Han, G. Lui, M. Li, G. Chiu, P. Fung and A. Yu, *Nano Energy*, 2017, **34**, 491–499.
- [9] C. Choi, H. J. Sim, G. M. Spinks, X. Lepró, R. H. Baughman and S. J. Kim, *Adv.*

*Energy Mater.*, 2016, **6**, 1502119–1502126.
